# Supplementary material for: Carboxylation of terminal alkynes promoted by silver carbamate at ambient pressure
Source: Royal Society of Chemistry journal article supplement (doi:10.1039/c9nj02203a), 2019-01-01
Supplement: c9nj02203a1.pdf [file c9nj02203a1.pdf]

# Carboxylation of Terminal Alkynes Promoted by Silver Carbamate at Ambient Pressure

Giulio Bresciani, Fabio Marchetti, Guido Pampaloni

**Table S1.** NMR data of alkynes and propiolic acids.

|                                                                                     | 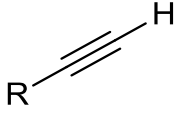                                                         |                                                                     |
|-------------------------------------------------------------------------------------|-------------------------------------------------------------------------------------------------------------------------------------------|-------------------------------------------------------------------------------------------------------------------------------------------------------|
|    | 7.48 (m, 2H, Ar-H), 7.40-7.21 (m, 3H, Ar-H), 3.06 (s, 1H, ≡CH)                                                                            | 13.62 (br, s, 1H, -COOH), 7.62 (d, 2H, Ar-H), 7.55 (t, 1H, Ar-H), 7.47 (t, 2H, Ar-H)                                                                  |
|    | 7.49 (m, 2H, Ar-H), 6.90 (m, 2H, Ar-H), 3.00 (s, 1H, ≡CH)                                                                                 | 13.75 (br, s, 1H, -COOH), 7.69 (m, 2H, Ar-H), 7.29 (m, 2H, Ar-H)                                                                                      |
|    | 7.83 (m, 2H, Ar-H), 7.22 (m, 2H, Ar-H), 3.05 (s, 1H, ≡CH), 2.63 (s, 3H, CH <sub>3</sub> )                                                 | 7.48 (d, 2H, Ar-H), 7.24 (d, 2H, Ar-H), 2.32 (s, 3H, CH <sub>3</sub> )                                                                                |
|    | 7.56-7.35 (m, 4H, Ar-H), 3.11 (s, 1H, ≡CH)                                                                                                | 7.67 (d, 2H, Ar-H), 7.57 (d, 2H, Ar-H)                                                                                                                |
|   | 7.41-7.35 (m, 4H, Ar-H), 4.06 (s, 1H, ≡CH), 1.25 (s, 9H, CH <sub>3</sub> )                                                                | 7.52 (d, 2H, Ar-H), 7.44 (d, 2H, Ar-H), 1.24 (s, 9H, CH <sub>3</sub> )                                                                                |
|  | 7.38-6.96 (m, 4H, Ar-H), 3.09 (s, 1H, ≡CH)                                                                                                | 7.49-7.41 (m, 3H, Ar-H), 7.36-7.31 (m, 1H, Ar-H)                                                                                                      |
|  | 8.42 (d, 1H, Ar-H); 7.88 (d, 2H, Ar-H); 7.79 (d, 1H, Ar-H); 7.63 (t, 1H, Ar-H); 7.56 (t, 1H, Ar-H); 7.45 (t, 1H, Ar-H); 3.52 (s, 1H, ≡CH) | 13.64 (br, s, 1H, -COOH), 8.22 (d, 1H, Ar-H), 8.07 (d, 1H, Ar-H), 7.98 (d, 1H, Ar-H), 7.90 (d, 1H, Ar-H), 7.69 (t, 1H, Ar-H), 7.62-7.53 (m, 2H, Ar-H) |
|  | 7.47 (m, 1H, Ar-H), 7.31 (m, 1H, Ar-H), 7.08 (m, 2H, Ar-H), 3.29 (s, 1H, ≡CH)                                                             | 11.41 (br, s, 1H, -COOH), 7.62 (t, 1H, Ar-H), 7.54 (q, 1H, Ar-H), 7.31-7.22 (m, 2H, Ar-H)                                                             |
|  | 2.15 (m, 2H, CH <sub>2</sub> -C), 1.93 (t, 1H, ≡CH), 1.55 (m, 2H, CH <sub>2</sub> -CH <sub>3</sub> ), 1.05 (t, 3H, CH <sub>3</sub> )      | 12.41 (br, s, 1H, -COOH), 2.32 (t, 2H, CH <sub>2</sub> -C), 1.49 (m, 2H, CH <sub>2</sub> -CH <sub>3</sub> ), 0.94 (t, 3H, CH <sub>3</sub> )           |
|  | 2.37 (s, 1H, ≡CH); 0.18 (s, 9H, CH <sub>3</sub> )                                                                                         | 9.09 (br, s, 1H, -COOH), 4.14 (s, 9H, CH <sub>3</sub> ),                                                                                              |
|  | 2.97 (s, 1H, ≡CH); 3.78 (s, 3H, CH <sub>3</sub> )                                                                                         | 8.50 (br, 1H, -COOH) 3.76 (s, 9H, CH <sub>3</sub> )                                                                                                   |
|  | 7.45 (s, 4H, Ar-H); 3.18 (s, 1H, ≡CH)                                                                                                     | 7.68 (s, 4H, Ar-H)                                                                                                                                    |

|                                                                                   |                                                                                                                                       |                                                                                       |
|-----------------------------------------------------------------------------------|---------------------------------------------------------------------------------------------------------------------------------------|---------------------------------------------------------------------------------------|
| 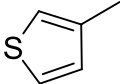 | 7.43 (dd, 1H); 7.17 (dd, 1H); 7.06 (dd, 1H); 2.95 (s, 1H), $\equiv\text{CH}$ );                                                       | 12.77 (br, 1H, -COOH), 8.13 (s, 1H), 7.64 (s, 1H), 7.30 (s, 1H)                       |
|  | 7.22 (t, 1H, Ar-H); 7.12 (d, 1H, Ar-H); 7.00 (t, 1H, Ar-H); 7.87 (dd, 1H, Ar-H); 5.60 (br, 1H, -OH); 3.11 (s, 1H, $\equiv\text{CH}$ ) | 9.92 (br, 1H, Ar-OH), 7.26 (m, 1H, Ar-H), 7.04 (m, 1H, Ar-H), 6.96-6.93 (m, 1H, Ar-H) |
|  | 8.60 (d, 1H, Ar-H); 8.25-8.17 (m, 4H, Ar-H); 8.11 (d, 2H, Ar-H); 8.04 (m, 2H, Ar-H); 3.63 (s, 1H, $\equiv\text{CH}$ )                 | 8.51-8.15 (m, 9H, Ar-H)                                                               |
